# Supplementary material for: What drives spatial variance of hydrological behaviour? An analysis of the regional groundwater-stream continuum
Source: Copernicus journal article supplement (doi:10.5194/egusphere-2025-3827), 2025-09-22
Supplement: Supplementary file [file egusphere-2025-3827-AC2-supplement.pdf]

## Review 2:

### To Author:

This research investigates the long-term drivers of streamflow and groundwater using principal components analysis. Overall, the idea of comparing hydrologic and hydrogeologic time series is an interesting study and more research should investigate the intersection of these similar disciplines.

- Thanks for that appreciation, and for a thorough review of our paper.

The scientific rigor of the research is fair, but I'm not convinced that the results themselves lend significant insight into the drivers of streamflow and groundwater head. The PC6 explains only 2.2% of the variance and I'm not convinced this is significant enough to scientifically render a conclusion that PC6 is a driver of streamflow and groundwater. I think the PC6 is likely a contributor to a more complex system, but not a "driver" of the system.

- Our analysis aimed at extracting best-possible evidence for drivers of observed spatial patterns rather than at providing sound proofs. The latter would not have been possible anyhow at the spatial scale of the analysis irrespective of the share of variance. We assume that hydrological processes in heterogeneous landscapes are subjected to a large variety of various drivers. Thus we did not restrict our analyses to the most important two or three ones. But we did our best to underpin our hypotheses with detailed investigation of the spatial and temporal patterns of the respective principal components. Note that we use the term "driver" in regard to the observed patterns, not in terms of the driving physical forces of water transport.

It is not clear why p-values are displayed for some PCs, but not others. The statistical significance is needed to justify and support the results. Similarly, it is not clear why autocorrelation is presented for some but not all PCs. Finally, it is not clear why the trend is present for some but not all of the PCs.

- As stated below our analysis aimed at extracting best-possible evidence for drivers of observed spatial patterns rather than at providing sound proofs. For each of the depicted principal components we provided only those pieces of information that we deemed helpful to test our hypotheses for plausibility, e.g., correlation with other variables, the effect of single principal components on autocorrelation or trends of the respective time series. These effects have been checked for all of the depicted principal components in the same way, but for the sake of brevity only the interesting results are presented in the manuscript. We will provide that information in the supplement.

All minor and major edits are described below:

### Introduction:

1. The justification for the research itself is not clear. You describe in paragraph 1 and 2 that scientists are "tasked with relating heterogeneities", however, you do not explain the perceived heterogeneities or what would cause them. For example, since climate factors are included in your analysis and discussed later in the introduction, it would be relevant here to explain climate change

as an important component of shifting hydrologic regimes. Additionally, you mention later that land use is included in your model and previous research – therefore, it would be relevant to highlight the impact of land use on hydrology. Therefore, I am recommending either an extension of paragraph 1 or an additional paragraph where you discuss the overall cause of hydrologic heterogeneities (e.g. climate change, land use, both, others?). Additionally, provide an explanation of the relevance and importance of the research – e.g. for watershed managers, water sustainability, etc.

- We regret that these aspects have not been clear enough and will modify the Introduction section accordingly. The motivation for this study is given in the first phrase of the Introduction section and is detailed in the following. The second phrase emphasizes the role of time series as the major source of information available to gain a better understanding of site-specific conditions and processes which are crucial for risk assessment for water resources management. Correspondingly, the term “heterogeneities” in line 29 refers to differences of temporal dynamics at different sites. Obviously, that was not clear enough and will be rephrased in the revised version of the manuscript. There is a huge body of literature on climate change effects on hydrology. We feel that scientists and water resources agencies are well aware of the key statements which do not need to be reflected here. Instead, the second paragraph focuses on the common approach to identify climate change (or other harmful) effects in given data sets and the problems this approach encounters in practice – which highlights the previous statement that we need to get a better understanding of the causes of different temporal dynamics at different sites. Paragraph 3 and 4 shortly reflect on the discussion in the literature on these possible causes. These include land use as well. Again we feel that readers of the journal are aware of the state of the art in this regard which does not need to be reflected here in more detail.

2. Your introduction is primary focused on streamflow trends. I am recommending an extension of paragraph three (e.g. line 52) on the interconnectedness of streamflow and groundwater and the importance between the relationship to watershed hydrology. For example, you say in your hypothesis “Here we go a step further and hypothesize, that stream discharge and groundwater head dynamics are nothing than two poles along a common gradient, being subject to the same processes, although at different degrees.” – however, you need to provide an explanation on the background between the interconnectedness and for why this is important to study (also, including the literature). How are streamflow and groundwater head “two poles along a common gradient”?

- The second paragraph of the Introduction refers to trends both in stream discharge and groundwater head data. Note that line 37 and line 40-44 focus on groundwater explicitly. In contrast, the third paragraph focuses on streamflow only. But here the focus is not on trends but on numerous studies aiming at a better understanding of the different dynamics at different sites. Although this has been studied for groundwater head dynamics as well, much more work has been done for stream discharge recently. In regard to the interconnectedness of streamflow and groundwater we refer to the literature and will add more references in the revised manuscript. The term “two poles along a common gradient” refers to the temporal dynamics, be it flux rates or pressure heads. It assumes that there is no fundamental difference between these two types of time series other than different degrees of damping of the input signal. We will rephrase it in the revised manuscript.

3. The introduction does not explain or justify the importance of the study area for studying the streamflow/groundwater dichotomy. I am requesting an additional paragraph after line 63 discussing the relevance and importance of the study area.

- We will add a short paragraph: “Thus there is urgent need for studies in regions which exhibit not only a dense network of stream gauges and groundwater observation wells, but large gradients in regard to topography, climate, land use, and geology as well. This was the motivation for the selection of the study region (see below).”

4. Additionally, after the paragraph above, explain the previous literature on using PCA for this research and why it is the best statistical model to answer the question you pose. Why this statistical model and not another factoring model? Why is factoring the most appropriate model for this research?

- Much of this information including references to the literature is provided in the Method section. For the sake of brevity, we will add only two phrases here: “In numerous studies principal component analysis has proven its great potential to extract the prevailing features in large sets of interrelated variables or time series. This data-driven approach allows to differentiate between generic and site-specific features without any pre-defined assumptions.”

## Data

1. Line 85 – 100 should be the study area section

- We feel that these 16 lines do not justify a separate section. Thus we propose to change the heading to “Study region and data”.

2. Line 100 should start the data section

- See comment above.

3. In line 103 – explain how the measurement sites were selected to reduce anthropogenic bias. You mention it but don’t explain it – provide a few more sentences explaining your process?

- The sites have been selected by the authorities who provided the data based on their knowledge about local site conditions. The phrase will be re-formulated to make that clear.

4. In line 103 – what is the temporal resolution – you say 43 full days – was it daily, weekly, monthly, etc?

- “43” refers to the total length of the time series in years, not to the temporal resolution. The data were provided mostly as daily mean values, but with exceptions for some groundwater head data and for some periods. Daily mean values of discharge have been calculated based on readings at 15 or 60 minutes intervals. In 44 out of 3,248,865 cases (15,695 days times 207 sites) one or more readings per day were missing. Only in one case did the gap cover a whole day, requiring interpolation between the preceding and the following day. Note that only 1/7 of these discharge data have been used eventually, that is, the values from every

Monday. Groundwater data mostly exhibited daily resolution, except for seven wells with weekly intervals. However, data gaps were more abundant. In total, 75% of the groundwater measurement days matched exactly the final time axis of weekly data. All other had to be interpolated, usually over a time span of a few days. As described in l. 105- 108 the maximum length of the gap to be filled by interpolation was defined by the autocorrelation of the respective time series.

5. Line 118 – Land use should be its own paragraph. Additional explanation is needed regarding what land use classifications are present, land use classifications used in the analysis, and a justification of the land use. Additionally, explanation of how the land use data were generated and whether they are raster or discrete data.

- Land use data were taken from a common remote sensing product, the Corine raster data (l. 118-120). We will provide more details in the revised version of the manuscript, including spatial resolution and the merging of various land use classes. The justification of including land use data as drivers of spatial heterogeneity of temporal dynamics is given in the Introduction section (l. 55-57), including references to the literature. We will elaborate a little bit more on how these data were used to characterize groundwater wells and will shift l. 125 (“Correspondingly, land use was determined within a radius of 500 m around each groundwater well.”) to this paragraph (see comment below).

6. Line 120 – more information needed on the raster climate data. 1. An explanation of how the data are created (from in situ data – or modelled data?). What is the temporal resolution of the data?

- The raster climate data were provided by the German Weather Service (DWD). Spatial resolution was 1 km. Data of the national network of weather stations operated by DWD were interpolated using altitude regression and Inverse Distance Weighting. More details are provided by the given reference (Deutscher Wetterdienst 2024).

7. With number of snow days – what is the temporal resolution?

- Temporal resolution is daily.

8. For potential evapotranspiration – what is the unit?

- The unit is mm per day. That information will be added in the manuscript.

9. Line 123 should probably go with the land use paragraph.

- We will elaborate a little bit more on how these data were used to characterize groundwater wells and will shift l. 125 (“Correspondingly, land use was determined within a radius of 500 m around each groundwater well.”) to this paragraph (see comment above).

10. Line 152: An explanation of the parameters used in the PCA package – did you do any manual parameterization or any model defined parameters?

- No other parameter settings have been used than normalization to zero mean and unit variance as stated in line 140-142.

11. Line 155 – it is not clear what package was used for the PCA analysis. The packages provided here cover trends analysis, mapping, and plotting.

- For PCA the “prcomp” routine was used. That information will be added in the manuscript.

#### Results:

1. The principal components 1-6 explain 77.8% of the variance in the streamflow and groundwater head. It is interesting that each PC was explainable. However, I’m not convinced that a 2.2% variance is significant enough to justify a “driver”. I think you need to 1. Provide literature and an iron-clad justification either in the methods or in the results that states your stance for including such low values 2. You need to call the PC with low explained variance something else – e.g. not “drivers” but “contributors” and explain the new organization. These PC categories likely contribute to a complex system, but do not, among themselves act as “drivers”.

- Our analysis aimed at extracting best-possible evidence for drivers of observed spatial patterns rather than at providing sound proofs. The latter would not have been possible anyhow at the spatial scale of the analysis irrespective of the share of variance. We assume that hydrological processes in heterogeneous landscapes are subjected to a large variety of various drivers. Thus we did not restrict our analyses to the most important two or three ones. But we did our best to underpin our hypotheses with detailed investigation of the spatial and temporal patterns of the respective principal components. Note that we use the term “driver” in regard to the observed patterns, not in terms of the driving physical forces of water transport.

2. Anywhere that the text mentions a “large correlation” – a p-value and R/R<sup>2</sup> should be included. For example, line 209 and line 211. Also the R/R<sup>2</sup> values need to be visualized in a table or figure and referenced in text.

- We checked whether we always gave the r values when we reported on significant correlation between principal component loadings of all sites and landscape features but did not find any exception. Note that “loadings” of single observed time series on single principal components are in fact “correlations” as well but being limited to single sites which would not allow for a standard significance test. This is the case, e.g., in line 209. The term “correlation” in line 336 actually refers to the loading. As this might be misleading, we will replace it by “loading”. In line 211 we report on the insignificant correlation between PC2 loadings and depth to groundwater, thus we refrained from giving the r value.

3. Line 214: The r is shown and referred to figure 4 – but the trend line and R value should be present on the figure.

- We guess you mean line 216-217 rather than l. 214 (Line 214 refers to the spectrum analysis in Fig. 3, lower right panel). We did not include the r values in Fig. 4 for the sake of clarity of the graph but provide that information in the text. Note that a modified Mann-Kendall test

was used for trend analysis that does not assume a linear but a monotonic trend. Thus any trend line would be misleading.

4. It is not clear why p-values are displayed for some PCs, but not others. The statistical significance is needed to justify and support the results. Similarly, it is not clear why autocorrelation is present for some but not all PCs. Finally, it is not clear why the trend is present for some but not all of the PCs. Therefore, I am recommending that all the PCs have a P-value table of loadings, an autocorrelation plot, and a trend plot (with R/R<sup>2</sup> values).

- As stated above our analysis aimed at extracting best-possible evidence for drivers of observed spatial patterns rather than at providing sound proofs. For each of the depicted principal components we provided only those pieces of information that we deemed helpful to test our hypotheses for plausibility, e.g., correlation with other variables or the effect of single principal components on autocorrelation or trends of the respective time series. These effects have been checked for all of the depicted principal components in the same way, but for the sake of brevity only the interesting results are presented in the manuscript. We will provide that information in the supplement.

#### Discussion:

1. I found the discussion to be quite good in describing the results in detail. However, if the introduction, methods, and results aren't updated as recommended above, your readers may never get to this section. The literature does a great job of pulling all the results together, however, most of the story and literature is not present in the introduction, therefore, making a clear disjunct/gap between the readers background knowledge, the understanding of the results, and the connection to the literature. Furthermore, the results themselves, as presented currently, do not support some of the literature and claims you make in the discussion. More statistical support is needed in the results for the readers to be truly convinced of the results that you're presenting.
  - We consider this a concluding comment that sums up the comments above. We hope that the modifications outlined above will substantially improve the comprehensibility of the paper.
